# Supplementary material for: Antimicrobial Spectrum of Activity and Mechanism of Action of Linear Alpha-Helical Peptides Inspired by Shrimp Anti-Lipopolysaccharide Factors
Source: MDPI journal article supplement (doi:10.3390/biom13010150), 2023-01-11
Supplement: s1 [file s1]

Table S1. Strains and media

| Strain                                       | Source | Origin            | Culture medium for growth | Culture medium for antimicrobial assays | Temperature | Comments                                                                                                                  |
|----------------------------------------------|--------|-------------------|---------------------------|-----------------------------------------|-------------|---------------------------------------------------------------------------------------------------------------------------|
| <b>Gram-positive bacteria</b>                |        |                   |                           |                                         |             |                                                                                                                           |
| <i>Bacillus subtilis</i> ATCC 6633           | Ref    | ATCC              | LB                        | PB                                      | 37 °C       | Used in sterility testing                                                                                                 |
| <i>Corynebacterium stationis</i> CIP 101282  | Ref    | Pasteur Institute | Zobell                    | Zobell 1/3                              | 30 °C       | Isolated from film of marine fouling organisms                                                                            |
| <i>Enterococcus faecalis</i> ATCC 29212      | Ref    | ATCC              | LB                        | PB                                      | 37 °C       | Isolated from urine and has applications in food testing, media testing, quality control, and water testing               |
| <i>Microbacterium maritipicum</i> CIP 105733 | Ref    | Pasteur Institute | Zobell                    | Zobell 1/3                              | 30 °C       | Isolated from seawater and marine mud                                                                                     |
| <i>Micrococcus luteus</i> CIP 5345           | Ref    | Pasteur Institute | LB                        | PB                                      | 30 °C       | Renamed <i>Kocuria rhizophila</i>                                                                                         |
| <i>Staphylococcus aureus</i> SG511           | Ref    | UM                | LB                        | PB                                      | 37 °C       | Used as a standard strain for antimicrobial susceptibility testing                                                        |
| <i>Staphylococcus aureus</i> ATCC 25932      | Ref    | ATCC              | LB                        | PB                                      | 37 °C       | Clinical isolate used as a quality control strain for some tests                                                          |
| <i>Staphylococcus aureus</i> ATCC 29737      | Ref    | ATCC              | LB                        | PB                                      | 37 °C       | Strain FDA used in sterility testing and susceptibility disc testing                                                      |
| <i>Staphylococcus aureus</i> 16003           | MRSA   | UFSC              | LB                        | PB                                      | 37 °C       | Isolated from a tracheal secretion of a hospitalized patient (resistant to ceftazidime)                                   |
| <i>Staphylococcus aureus</i> 16006           | MRSA   | UFSC              | LB                        | PB                                      | 37 °C       | Isolated from the blood of a hospitalized patient (resistant to ceftazidime, ciprofloxacin, clindamycin and erythromycin) |

| Strain                                  | Source | Origin            | Culture medium for growth | Culture medium for antimicrobial assays | Temperature | Comment                                                                                                                                                                              |
|-----------------------------------------|--------|-------------------|---------------------------|-----------------------------------------|-------------|--------------------------------------------------------------------------------------------------------------------------------------------------------------------------------------|
| <i>Staphylococcus aureus</i> 17018      | MRSA   | UFSC              | LB                        | PB                                      | 37 °C       | Isolated from a tracheal aspirate of a hospitalized patient (resistant to ceftiofur, ciprofloxacin, clindamycin, erythromycin and gentamicin)                                        |
| <i>Staphylococcus aureus</i> 17022      | MRSA   | UFSC              | LB                        | PB                                      | 37 °C       | Isolated from a bone fragment of a hospitalized patient (resistant to ceftiofur, ciprofloxacin, clindamycin, erythromycin, gentamicin, rifampicin and trimethoprim-sulfamethoxazole) |
| <b>Gram-negative bacteria</b>           |        |                   |                           |                                         |             |                                                                                                                                                                                      |
| <i>Escherichia coli</i> SBS 363         | Ref    | Pasteur Institute | LB                        | PB                                      | 37 °C       | Used as a standard strain for antimicrobial susceptibility testing                                                                                                                   |
| <i>Pseudomonas aeruginosa</i> ATCC 9027 | Ref    | ATCC              | LB                        | PB                                      | 37 °C       | Isolated from an outer ear infection used in efficacy testing, media testing, and preparatory test control                                                                           |
| <i>Vibrio alginolyticus</i> ATCC 17749  | Ref    | ATCC              | LB-NaCl                   | PB-NaCl                                 | 20 °C       | Isolated in Japan from spoiled horse mackerel that resulted in food poisoning                                                                                                        |
| <i>Vibrio anguillarum</i> ATCC 19264    | Ref    | ATCC              | LB-NaCl                   | PB-NaCl                                 | 20 °C       | Type strain isolated from ulcerous lesion in cod                                                                                                                                     |
| <i>Vibrio fluvialis</i> EMBRAPA-SE      | Env    | EMBRAPA           | LB-NaCl                   | PB-NaCl                                 | 20 °C       | Environmental strain isolated from diseased shrimp                                                                                                                                   |

| Strain                                      | Source | Origin             | Culture medium for growth | Culture medium for antimicrobial assays | Temperature | Comment                                                                        |
|---------------------------------------------|--------|--------------------|---------------------------|-----------------------------------------|-------------|--------------------------------------------------------------------------------|
| <i>Vibrio harveyi</i> ATCC 14126            | Ref    | ATCC               | LB-NaCl                   | PB-NaCl                                 | 20 °C       | Type strain isolated from a dead luminescing amphipod, <i>Talorchestia</i> sp. |
| <i>Vibrio nigripulchritudo</i> CIP 103195   | Ref    | Pasteur Institute  | LB-NaCl                   | PB-NaCl                                 | 28 °C       | Isolated from seawater enriched with chitin                                    |
| <i>Vibrio parahaemolyticus</i> IOC 18950    | Ref    | IOC                | LB-NaCl                   | PB-NaCl                                 | 20 °C       | A standard strain from an outbreak in Cascavel (Brazil)                        |
| <i>Vibrio parahaemolyticus</i> EMBRAPA-SE   | Env    | EMBRAPA            | LB-NaCl                   | PB-NaCl                                 | 20 °C       | Environmental strain isolated from diseased shrimp                             |
| <b>Filamentous fungi</b>                    |        |                    |                           |                                         |             |                                                                                |
| <i>Aspergillus brasiliensis</i> ATCC 16404  | Ref    | ATCC               | PDA                       | ½ PDB                                   | 28 °C       | Isolated from blueberry                                                        |
| <i>Aspergillus niger</i> LAMPB-UFSC DR02    | Env    | LAMPB              | PDA                       | ½ PDB                                   | 28 °C       | Endophytic fungi of <i>Platanus orientalis</i>                                 |
| <i>Colletotrichum chrysophilum</i> MANE 147 | Ref    | MANE               | PDA                       | ½ PDB                                   | 28 °C       | Isolated from apple leaf/Gala                                                  |
| <i>Colletotrichum higginsianum</i> MANE 166 | Ref    | MANE               | PDA                       | ½ PDB                                   | 28 °C       | Isolated from <i>Arabidopsis thaliana</i>                                      |
| <i>Fusarium oxysporum</i> MUCL 909          | Ref    | UM                 | PDA                       | ½ PDB                                   | 28 °C       | Shrimp opportunistic pathogen                                                  |
| <i>Penicillium</i> sp. LIAA-UFSC            | Env    | LIAA               | PDA                       | ½ PDB                                   | 28 °C       | Environmental strain isolated from shrimp midgut                               |
| <i>Rhizopus</i> sp. LAMPB-UFSC              | Env    | LAMPB              | PDA                       | ½ PDB                                   | 28 °C       | Environmental strain isolated from air                                         |
| <i>Trichoderma virens</i> ATCC 9645         | Ref    | ATCC               | PDA                       | ½ PDB                                   | 28 °C       | Isolated from soil                                                             |
| <b>Yeast</b>                                |        |                    |                           |                                         |             |                                                                                |
| <i>Candida albicans</i> 12A (MDM8)          | Ref    | Butantan Institute | Sabouraud                 | Sabouraud                               | 28 °C       | Standard strain used in antimicrobial tests                                    |

| Strain                                 | Source | Origin | Culture medium for growth | Culture medium for antimicrobial assays | Temperature | Comment                                                                                  |
|----------------------------------------|--------|--------|---------------------------|-----------------------------------------|-------------|------------------------------------------------------------------------------------------|
| <i>Candida krusei</i> ATCC 6258        | Ref    | ATCC   | Sabouraud                 | Sabouraud                               | 28 °C       | Quality control strain isolated from sputum of patient with bronchomycosis               |
| <i>Candida glabrata</i> CCT 0728       | Ref    | CCT    | Sabouraud                 | Sabouraud                               | 28 °C       | -                                                                                        |
| <i>Candida parapsilosis</i> ATCC 22019 | Ref    | ATCC   | Sabouraud                 | Sabouraud                               | 28 °C       | Type strain for industrial biotechnology and quality control isolated from case of sprue |
| <i>Candida tropicalis</i> LMC-UFSC     | Ref    | UFSC   | Sabouraud                 | Sabouraud                               | 28 °C       | -                                                                                        |
| <i>Rhodotorula</i> sp. LIAA-UFSC       | Env    | LIAA   | Sabouraud                 | Sabouraud                               | 28 °C       | Environmental strain isolated from shrimp midgut                                         |
| <i>Saccharomyces cerevisiae</i> CAT1   | Ref    | UFSC   | Sabouraud                 | Sabouraud                               | 28 °C       | Industrial fuel-ethanol fermentative strain                                              |

ATCC, American Type Culture Collection; CCT, Collection of Tropical Cultures; CIP, Collection de l'Institut Pasteur; EMBRAPA, Empresa Brasileira de Pesquisa Agropecuária; Env, environmental isolate; IOC, Oswaldo Cruz Institute; LAMPB, Laboratory of Microorganisms and Biotechnological Processes; LIAA, Laboratory of Immunology Applied to Aquaculture; MANE, Micoteca Anne Löre Schroeder; MRSA: Methicillin-resistant *Staphylococcus aureus*; MUCL, Université Catholique de Louvain; Ref, reference strain; UFSC, Federal University of Santa Catarina; UM, University of Montpellier. Comment on and origins have been indicated where available.

Luria-Bertani (LB) medium (10 g/L bactopectone, 5 g/L yeast extract, 10 g/L NaCl, pH 7.2). Poor broth (PB) medium (10 g/L bactopectone, 10 g/L NaCl, pH 7.2). LB-NaCl (10 g/L bactopectone, 5 g/L yeast extract, 30 g/L NaCl, pH 7.2). PB-NaCl (10 g/L bactopectone, 30 g/L NaCl, pH 7.2). Zobell medium (4 g/L bactopectone, 1 g/L yeast extract, 400 mM NaCl, 20 mM KCl, 5 mM MgSO<sub>4</sub>, 1.4 mM CaCl<sub>2</sub>, pH 7.2). Zobell 1/3 medium (1.3 g/L bactopectone, 0.33 g/L yeast extract, 400 mM NaCl, 20 mM KCl, 5 mM MgSO<sub>4</sub>, 1.4 mM CaCl<sub>2</sub>, pH 7.2). Sabouraud medium (10 g/L bactopectone, 40 g/L dextrose, pH 5.6). Potato Dextrose Agar (PDA, 26 g/L Potato Dextrose Broth, 1.5% agar, pH 5.6). ½ Potato Dextrose Broth (½ PDB, 13.5 g/L Potato Dextrose Broth, pH 5.6).
